# Supplementary material for: Disclosing the formation of ring-banded spherulites for semicrystalline polymers through the double-layer film method
Source: Royal Society of Chemistry journal article supplement (doi:10.1039/c3ce42083c), 2013-12-13
Supplement: c3ce42083c.pdf [file c3ce42083c.pdf]

## Supplementary information for

# Disclosing the formation of ring-banded spherulites for semicrystalline polymers through the double-layer film method†

Yaqiong Zhang, Huagao Fang, Zhongkai Wang, Miao Tang, and Zhigang

Wang\*

*CAS Key Laboratory of Soft Matter Chemistry, Department of Polymer Science and Engineering, Hefei National Laboratory for Physical Sciences at the Microscale, University of Science and Technology of China, Hefei, Anhui Province 230026, P. R. China. E-mail: zgwang2@ustc.edu.cn; Fax: +86 551-63607703; Tel: +86 551-63607703*

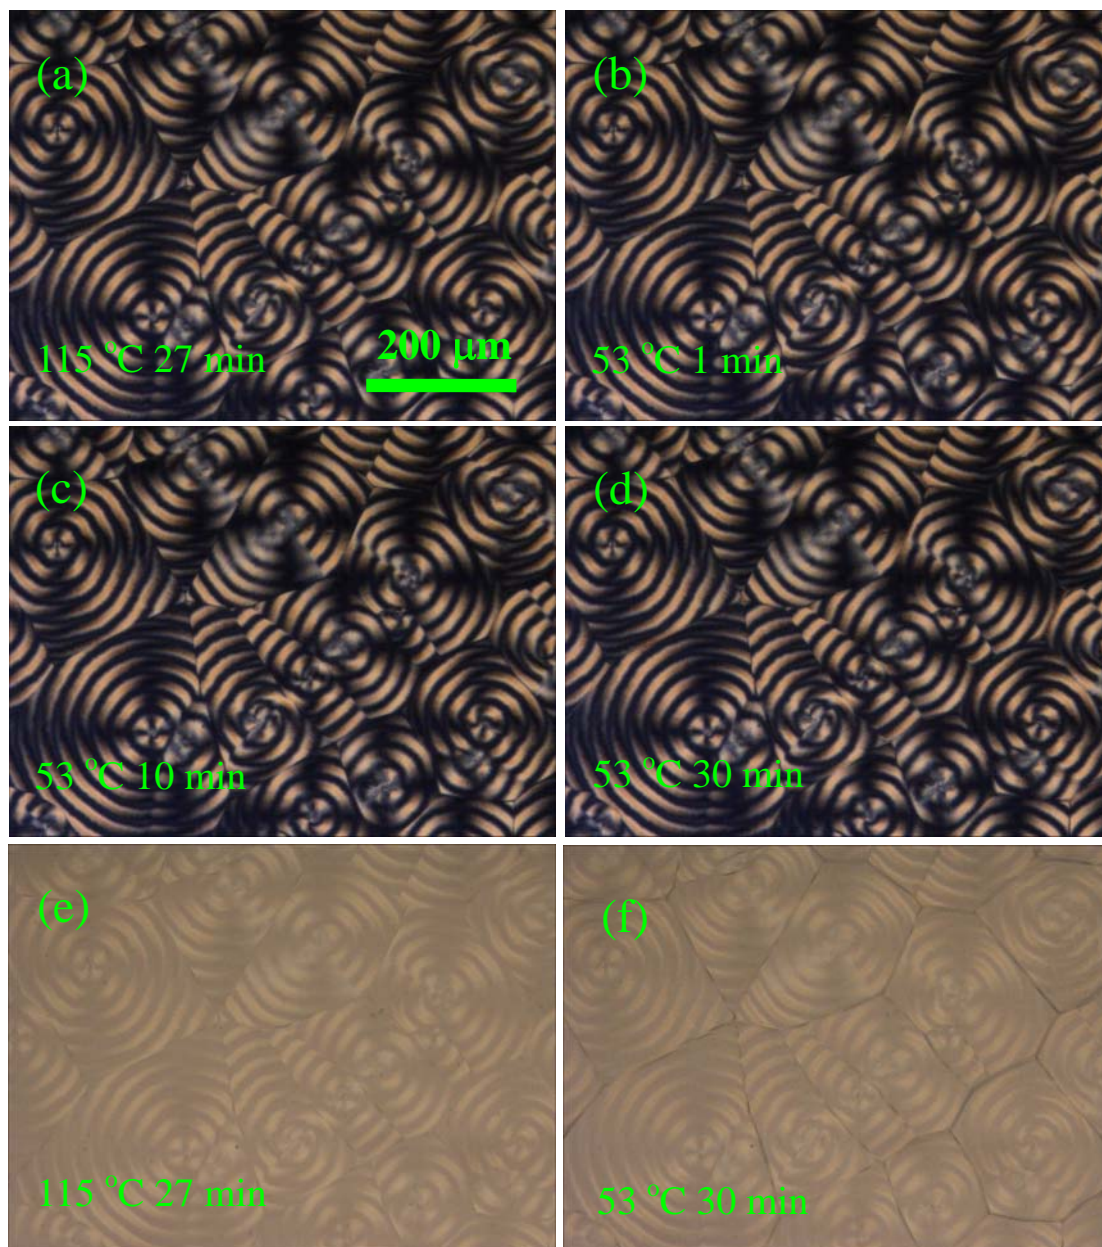

**Fig. S1** POM (a-d) and OM (e, f) micrographs for PLA/PEO 75/25 blend films during isothermal crystallization at two-step crystallization temperatures of 115 and 53 °C, respectively, (a) 115 °C for 27 min; (b) 53 °C for 1 min; (c) 53 °C for 10 min; (d) 53 °C for 30 min; (e) 115 °C for 27 min (bright field micrograph); and (f) 53 °C for 30 min (bright field micrograph). The film samples were melted at 180 °C for 5 min before the first step quench. The scale bar in (a) represents 200 μm and is applied to all other micrographs.

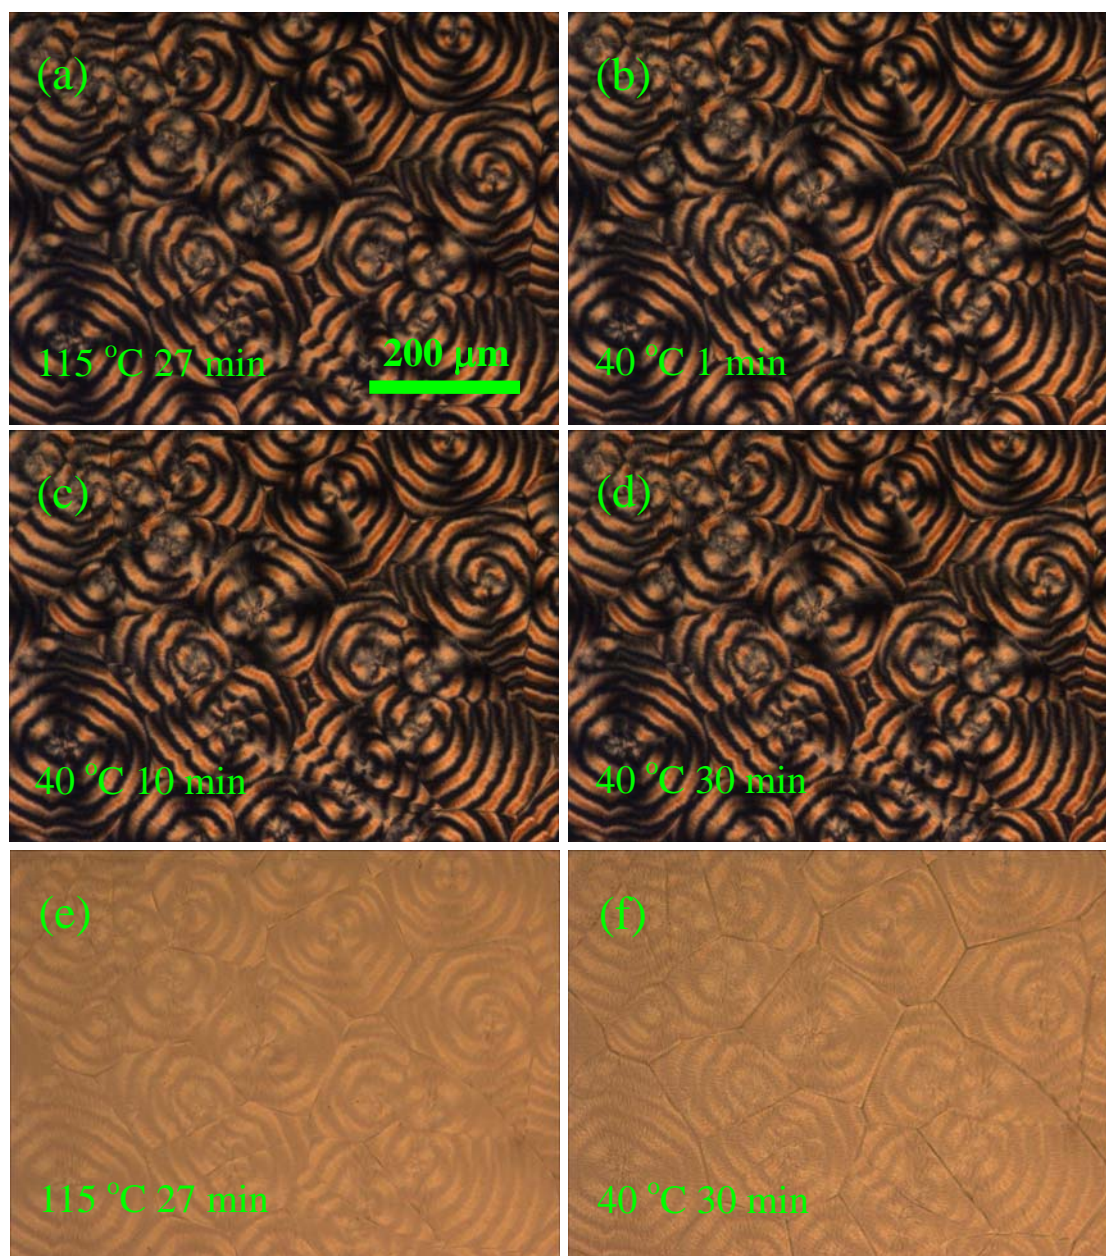

**Fig. S2** POM (a-d) and OM (e, f) micrographs for PLA/PEO 75/25 blend films during isothermal crystallization at two-step crystallization temperatures of 115 and 40 °C, respectively, (a) 115 °C for 27 min; (b) 40 °C for 1 min; (c) 40 °C for 10 min; (d) 40 °C for 30 min; (e) 115 °C for 27 min (bright field micrograph); and (f) 40 °C for 30 min (bright field micrograph). The film samples were melted at 180 °C for 5 min before the first step quench. The scale bar in (a) represents 200 μm and is applied to all other micrographs.
